# Supplementary material for: Agricultural use of compost under different irrigation strategies in a hedgerow olive grove under Mediterranean conditions – a comparison with traditional systems
Source: Copernicus journal article supplement (doi:10.5194/soil-9-325-2023), 2023-06-19
Supplement: Supplementary file 1 [file soil-9-325-2023-supplement.pdf]

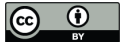

*Supplement of*

**Agricultural use of compost under different irrigation strategies in a hedgerow olive grove under Mediterranean conditions – a comparison with traditional systems**

**Laura L. de Sosa et al.**

*Correspondence to:* Laura L. de Sosa ([lauralozano@irnsa.csic.es](mailto:lauralozano@irnsa.csic.es))

The copyright of individual parts of the supplement might differ from the article licence.

Figure S1. Average precipitations (histograms), temperature, and air humidity (stacked lines) and chronogram of the compost addition, soil sampling and irrigation months performed during the experiment at the super-intensive and intensive traditional plots.

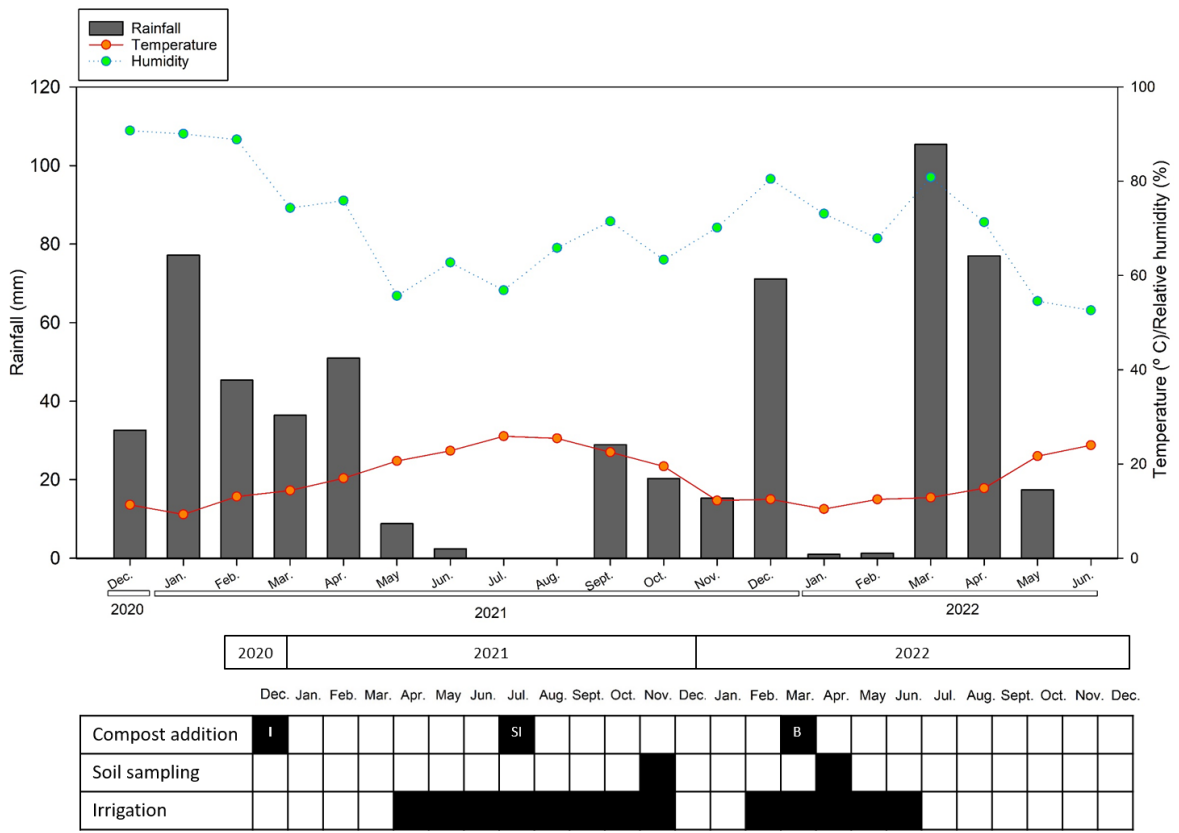

I: intensive plots; SI: super-intensive plots; B: both plots

Table S1. Amount of water (mm) provided monthly under different irrigation management: D: deficit irrigation, F: full irrigation and fertilizer addition: alperujo compost (C) or no letter (Ø) to refer to the inorganic fertilization.

|      |       | <b>mm H<sub>2</sub>O</b> |           |          |           |
|------|-------|--------------------------|-----------|----------|-----------|
|      |       | <b>F</b>                 | <b>FC</b> | <b>D</b> | <b>DC</b> |
| 2021 | April | 63.7                     | 59.6      | 14.7     | 18.1      |
|      | May   | 51.4                     | 58.3      | 28.5     | 28.5      |
|      | June  | 99.4                     | 80.6      | 49.5     | 46.9      |
|      | July  | 144                      | 142       | 27.3     | 51.6      |
|      | Sept. | 115                      | 111       | 49.8     | 34.6      |
|      | Oct.  | 198                      | 202       | 90.9     | 86.4      |
|      | Nov.  | 91.7                     | 74.3      | 46.2     | 38.4      |
| 2022 | Feb.  | 14.3                     | 17.9      | 9.1      | 6.2       |
|      | Mar.  | 50.6                     | 52.3      | 15.6     | 6.9       |
|      | Apr.  | 77.4                     | 85.6      | 17.2     | 8.5       |
|      | May   | 108                      | 110       | 29.4     | 19.0      |
|      | June  | 105                      | 101       | 26.2     | 32.1      |

Table S2. Soil parameters at the hedgerow plots during the two years of the experiments under different irrigation management: NI: no irrigation, D: deficit irrigation, F: full irrigation and fertilization addition: compost (C) or no letter (Ø) to refer to the inorganic fertilization at different sampling times. See Table 3 for the statistical analysis. The irrigation factor refers to pooled values from the two fertilization treatments. Data are mean values  $\pm$  standard error of the mean (SEM). SWC: soil water content, EC: electrical conductivity, SOM: soil organic matter, WSC: water-soluble carbon, TN: total nitrogen.

|                                                        |           | NI              | NIC             | D               | DC              | F               | FC              |
|--------------------------------------------------------|-----------|-----------------|-----------------|-----------------|-----------------|-----------------|-----------------|
| SWC (%)                                                | Nov. 2021 | 8.79 $\pm$ 0.50 | 8.82 $\pm$ 0.67 | 8.48 $\pm$ 0.38 | 11.3 $\pm$ 0.20 | 10.8 $\pm$ 0.72 | 11.5 $\pm$ 1.04 |
|                                                        | Apr. 2022 | 7.16 $\pm$ 0.35 | 8.27 $\pm$ 1.04 | 6.56 $\pm$ 0.62 | 8.32 $\pm$ 0.21 | 10.3 $\pm$ 0.76 | 9.91 $\pm$ 0.44 |
| pH                                                     | Nov. 2021 | 8.38 $\pm$ 0.23 | 8.58 $\pm$ 0.08 | 8.49 $\pm$ 0.02 | 8.21 $\pm$ 0.06 | 8.36 $\pm$ 0.14 | 8.41 $\pm$ 0.13 |
|                                                        | Apr. 2022 | 8.51 $\pm$ 0.20 | 8.84 $\pm$ 0.03 | 9.00 $\pm$ 0.21 | 8.94 $\pm$ 0.12 | 9.30 $\pm$ 0.14 | 9.15 $\pm$ 0.09 |
| EC<br>( $\mu$ S cm <sup>-1</sup> )                     | Nov. 2021 | 125 $\pm$ 9.96  | 192 $\pm$ 19.2  | 149 $\pm$ 39.2  | 377 $\pm$ 42.2  | 452 $\pm$ 2.50  | 352 $\pm$ 48.0  |
|                                                        | Apr. 2022 | 107 $\pm$ 5.27  | 116 $\pm$ 2.54  | 129 $\pm$ 19.5  | 135 $\pm$ 7.88  | 174 $\pm$ 16.0  | 159 $\pm$ 12.2  |
| SOM<br>(%)                                             | Nov. 2021 | 1.78 $\pm$ 0.26 | 2.03 $\pm$ 0.04 | 1.78 $\pm$ 0.22 | 2.29 $\pm$ 0.42 | 1.68 $\pm$ 0.23 | 2.67 $\pm$ 0.03 |
|                                                        | Apr. 2022 | 1.67 $\pm$ 0.13 | 1.90 $\pm$ 0.07 | 1.70 $\pm$ 0.08 | 1.93 $\pm$ 0.16 | 1.46 $\pm$ 0.04 | 1.64 $\pm$ 0.06 |
| WSC<br>(mg kg <sup>-1</sup> )                          | Nov. 2021 | 245 $\pm$ 44.8  | 410 $\pm$ 1.75  | 298 $\pm$ 16.0  | 391 $\pm$ 10.4  | 284 $\pm$ 6.08  | 631 $\pm$ 9.85  |
|                                                        | Apr. 2022 | 146 $\pm$ 8.71  | 223 $\pm$ 12.6  | 192 $\pm$ 30.9  | 304 $\pm$ 12.1  | 229 $\pm$ 18.2  | 280 $\pm$ 14.5  |
| TN<br>(g kg <sup>-1</sup> )                            | Nov. 2021 | 0.90 $\pm$ 0.05 | 1.15 $\pm$ 0.01 | 1.00 $\pm$ 0.07 | 1.13 $\pm$ 0.16 | 0.81 $\pm$ 0.04 | 1.28 $\pm$ 0.20 |
|                                                        | Apr. 2022 | 0.91 $\pm$ 0.07 | 1.04 $\pm$ 0.04 | 0.80 $\pm$ 0.03 | 1.02 $\pm$ 0.05 | 0.77 $\pm$ 0.02 | 1.12 $\pm$ 0.28 |
| NO <sub>3</sub> <sup>-</sup><br>(mg kg <sup>-1</sup> ) | Nov. 2021 | 11.3 $\pm$ 4.23 | 15.3 $\pm$ 4.96 | 5.60 $\pm$ 0.79 | 12.3 $\pm$ 4.80 | 15.8 $\pm$ 6.70 | 4.40 $\pm$ 1.88 |
|                                                        | Apr. 2022 | 5.50 $\pm$ 0.06 | 5.37 $\pm$ 0.17 | 2.83 $\pm$ 0.13 | 5.13 $\pm$ 0.07 | 3.17 $\pm$ 0.09 | 3.70 $\pm$ 0.21 |
| NH <sub>4</sub> <sup>+</sup><br>(mg kg <sup>-1</sup> ) | Nov. 2021 | 1.73 $\pm$ 0.12 | 1.97 $\pm$ 0.07 | 1.73 $\pm$ 0.09 | 1.90 $\pm$ 0.06 | 1.70 $\pm$ 0.15 | 2.00 $\pm$ 0.23 |
|                                                        | Apr. 2022 | 1.50 $\pm$ 0.82 | 1.40 $\pm$ 0.23 | 1.07 $\pm$ 0.43 | 1.33 $\pm$ 0.62 | 1.43 $\pm$ 0.30 | 0.90 $\pm$ 0.58 |
| Olsen-P<br>(mg kg <sup>-1</sup> )                      | Nov. 2021 | 7.67 $\pm$ 2.26 | 14.9 $\pm$ 0.78 | 4.73 $\pm$ 1.30 | 8.90 $\pm$ 4.50 | 6.93 $\pm$ 3.39 | 10.3 $\pm$ 3.47 |
|                                                        | Apr. 2022 | 11.3 $\pm$ 2.10 | 15.7 $\pm$ 2.00 | 5.27 $\pm$ 0.32 | 16.5 $\pm$ 2.27 | 4.87 $\pm$ 1.17 | 9.60 $\pm$ 0.53 |
| Available-K<br>(mg kg <sup>-1</sup> )                  | Nov. 2021 | 275 $\pm$ 22.7  | 394 $\pm$ 9.00  | 297 $\pm$ 6.03  | 390 $\pm$ 92.8  | 284 $\pm$ 23.7  | 631 $\pm$ 95.4  |
|                                                        | Apr. 2022 | 333 $\pm$ 102   | 389 $\pm$ 37.3  | 312 $\pm$ 95.0  | 538 $\pm$ 37.1  | 202 $\pm$ 12.6  | 393 $\pm$ 10.4  |

Table S3. Soil parameters at the intensive traditional plots during the two years of the experiments under a rainfed management and fertilizer addition: compost (C) or no letter (Ø) to refer to the inorganic fertilization at different sampling times. See Table 5 for the statistical analysis. Data are mean values  $\pm$  standard error of the mean (SEM). SWC: soil water content, EC: electrical conductivity, SOM: soil organic matter, WSC: water-soluble carbon, TN: total nitrogen.

|                                                         |           | <b>NI</b>       | <b>NIC</b>      |
|---------------------------------------------------------|-----------|-----------------|-----------------|
| SWC (%)                                                 | Nov. 2021 | 8.31 $\pm$ 1.53 | 9.74 $\pm$ 0.15 |
|                                                         | Apr. 2022 | 6.46 $\pm$ 0.85 | 8.54 $\pm$ 0.53 |
| pH                                                      | Nov. 2021 | 7.76 $\pm$ 0.21 | 8.42 $\pm$ 0.02 |
|                                                         | Apr. 2022 | 7.71 $\pm$ 0.39 | 8.54 $\pm$ 0.06 |
| EC<br>( $\mu\text{S cm}^{-1}$ )                         | Nov. 2021 | 98.7 $\pm$ 11.2 | 135 $\pm$ 8.50  |
|                                                         | Apr. 2022 | 99.0 $\pm$ 11.1 | 165 $\pm$ 26.2  |
| SOM<br>(%)                                              | Nov. 2021 | 2.21 $\pm$ 0.33 | 2.23 $\pm$ 0.11 |
|                                                         | Apr. 2022 | 2.15 $\pm$ 0.20 | 2.58 $\pm$ 0.05 |
| WSC<br>( $\text{mg kg}^{-1}$ )                          | Nov. 2021 | 322 $\pm$ 176   | 326 $\pm$ 32.3  |
|                                                         | Apr. 2022 | 190 $\pm$ 18.6  | 355 $\pm$ 59.2  |
| TN<br>( $\text{g kg}^{-1}$ )                            | Nov. 2021 | 1.01 $\pm$ 0.11 | 1.11 $\pm$ 0.05 |
|                                                         | Apr. 2022 | 0.94 $\pm$ 0.07 | 1.17 $\pm$ 0.07 |
| NO <sub>3</sub> <sup>-</sup><br>( $\text{mg kg}^{-1}$ ) | Nov. 2021 | 15.4 $\pm$ 5.6  | 15.4 $\pm$ 3.73 |
|                                                         | Apr. 2022 | 2.90 $\pm$ 0.40 | 7.03 $\pm$ 0.66 |
| NH <sub>4</sub> <sup>+</sup><br>( $\text{mg kg}^{-1}$ ) | Nov. 2021 | 1.61 $\pm$ 0.21 | 1.93 $\pm$ 0.09 |
|                                                         | Apr. 2022 | 1.33 $\pm$ 0.12 | 0.53 $\pm$ 0.05 |
| Olsen-P<br>( $\text{mg kg}^{-1}$ )                      | Nov. 2021 | 14.5 $\pm$ 1.2  | 13.8 $\pm$ 1.71 |
|                                                         | Apr. 2022 | 27.1 $\pm$ 5.60 | 31.4 $\pm$ 7.73 |
| Available-K<br>( $\text{mg kg}^{-1}$ )                  | Nov. 2021 | 265 $\pm$ 20.9  | 546 $\pm$ 79.7  |
|                                                         | Apr. 2022 | 416 $\pm$ 58.9  | 1359 $\pm$ 229  |
